# Supplementary material for: Hsp70 Gene Family in Sebastiscus marmoratus: The Genome-Wide Identification and Transcriptome Analysis under Thermal Stress
Source: MDPI journal article supplement (doi:10.3390/genes14091779), 2023-09-09
Supplement: s1 [file s1]

Table S1 The species accession numbers of Hsp70 cited in the present study

| Associated Gene Name | NCBI Protein ID               | Species Name | Latin name          |
|----------------------|-------------------------------|--------------|---------------------|
| Human_HSPA1A         | NP_005336.3                   | human        | <i>Homo sapiens</i> |
| Human_HSPA1B         | NP_005337.2                   | human        | <i>Homo sapiens</i> |
| Human_HSPA1L         | NP_005518.3                   | human        | <i>Homo sapiens</i> |
| Human_HSPA2          | NP_068814.2                   | human        | <i>Homo sapiens</i> |
| Human_HSPA4          | NP_002145.3                   | human        | <i>Homo sapiens</i> |
| Human_HSPA4L         | NP_055093.2                   | human        | <i>Homo sapiens</i> |
| Human_HSPA5          | NP_005338.1                   | human        | <i>Homo sapiens</i> |
| Human_HSPA6          | NP_002146.2                   | human        | <i>Homo sapiens</i> |
| Human_HSPA7          | UniProtKB/Swiss-Prot:P48741.2 | human        | <i>Homo sapiens</i> |
| Human_HSPA8          | NP_006588.1                   | human        | <i>Homo sapiens</i> |
| Human_HSPA9          | NP_004125.3                   | human        | <i>Homo sapiens</i> |
| Human_HSPA12A        | NP_079291.2                   | human        | <i>Homo sapiens</i> |
| Human_HSPA12B        | NP_443202.3                   | human        | <i>Homo sapiens</i> |
| Human_HSPA13         | NP_008879.3                   | human        | <i>Homo sapiens</i> |
| Human_HSPA14         | NP_057383.2                   | human        | <i>Homo sapiens</i> |
| Human_HSPH1          | NP_006635.2                   | human        | <i>Homo sapiens</i> |
| Human_HYOU1          | NP_001124463.1                | human        | <i>Homo sapiens</i> |

  

| Associated Gene Name | NCBI Protein ID | Species Name | Latin name          |
|----------------------|-----------------|--------------|---------------------|
| Mouse_HSPA1A         | NP_034609.2     | Mouse        | <i>Mus musculus</i> |
| Mouse_HSPA1B         | NP_034608.2     | Mouse        | <i>Mus musculus</i> |
| Mouse_HSPA1L         | NP_038586.2     | Mouse        | <i>Mus musculus</i> |
| Mouse_HSPA2          | NP_001002012.1  | Mouse        | <i>Mus musculus</i> |
| Mouse_HSPA4          | NP_032326.3     | Mouse        | <i>Mus musculus</i> |
| Mouse_HSPA4L         | NP_035150.3     | Mouse        | <i>Mus musculus</i> |
| Mouse_HSPA5          | NP_001156906.1  | Mouse        | <i>Mus musculus</i> |
| Mouse_Hspa8          | NP_112442.2     | Mouse        | <i>Mus musculus</i> |
| Mouse_HSPA9          | NP_034611.2     | Mouse        | <i>Mus musculus</i> |
| Mouse_HSPA12A        | NP_780408.1     | Mouse        | <i>Mus musculus</i> |
| Mouse_HSPA12B        | NP_082582.1     | Mouse        | <i>Mus musculus</i> |
| Mouse_HSPA13         | NP_084477.1     | Mouse        | <i>Mus musculus</i> |
| Mouse_HSPA14         | NP_056580.2     | Mouse        | <i>Mus musculus</i> |
| Mouse_HSPH1          | NP_038587.2     | Mouse        | <i>Mus musculus</i> |
| Mouse_HYOU1          | NP_067370.3     | Mouse        | <i>Mus musculus</i> |

  

| Associated Gene Name | NCBI Protein ID    | Species Name | Latin name                      |
|----------------------|--------------------|--------------|---------------------------------|
| Platypus_HSPA2       | ENSOANP00000015027 | Platypus     | <i>Ornithorhynchus anatinus</i> |
| Platypus_HSPA4       | ENSOANP00000011834 | Platypus     | <i>Ornithorhynchus anatinus</i> |
| Platypus_HSPA4L      | ENSOANP00000032051 | Platypus     | <i>Ornithorhynchus anatinus</i> |
| Platypus_HSPA5       | ENSOANP00000020985 | Platypus     | <i>Ornithorhynchus anatinus</i> |
| Platypus_HSPA6       | ENSOANP00000008582 | Platypus     | <i>Ornithorhynchus anatinus</i> |
| Platypus_HSPA12A     | ENSOANP00000022296 | Platypus     | <i>Ornithorhynchus anatinus</i> |

|                       |                    |          |                                 |
|-----------------------|--------------------|----------|---------------------------------|
| Platypus_HSPA13       | ENSOANP00000004718 | Platypus | <i>Ornithorhynchus anatinus</i> |
| Platypus_HSPA14       | ENSOANP00000025044 | Platypus | <i>Ornithorhynchus anatinus</i> |
| Platypus_Loc100091897 | XP_001510204.2     | Platypus | <i>Ornithorhynchus anatinus</i> |
| Platypus_Loc100080044 | XP_001510947.2     | Platypus | <i>Ornithorhynchus anatinus</i> |
| Platypus_Loc100078184 | XP_001509055.2     | Platypus | <i>Ornithorhynchus anatinus</i> |

| Associated Gene Name | NCBI Protein ID | Species Name | Latin name           |
|----------------------|-----------------|--------------|----------------------|
| Chicken_HSPA2        | NP_001006686.1  | chicken      | <i>Gallus gallus</i> |
| Chicken_HSPA4        | XP_003642142.1  | chicken      | <i>Gallus gallus</i> |
| Chicken_HSPA4L       | NP_001012594.1  | chicken      | <i>Gallus gallus</i> |
| Chicken_HSPA5        | NP_990822.1     | chicken      | <i>Gallus gallus</i> |
| Chicken_HSPA8        | NP_990334.1     | chicken      | <i>Gallus gallus</i> |
| Chicken_HSPA9        | NP_001006147.1  | chicken      | <i>Gallus gallus</i> |
| Chicken_HSPA12A      | XP_421779.3     | chicken      | <i>Gallus gallus</i> |
| Chicken_Loc770082    | XP_001233402.2  | chicken      | <i>Gallus gallus</i> |
| Chicken_HSPA13       | NP_001025964.2  | chicken      | <i>Gallus gallus</i> |
| Chicken_HSPA14       | XP_416996.3     | chicken      | <i>Gallus gallus</i> |
| Chicken_HSPH1        | NP_001153170.1  | chicken      | <i>Gallus gallus</i> |
| Chicken_HYOU1        | NP_001006588.1  | chicken      | <i>Gallus gallus</i> |

| Associated Gene Name | Ensemble Protein ID | Species Name | Latin name                 |
|----------------------|---------------------|--------------|----------------------------|
| Lizard_HSPA2         | ENSACAP00000015494  | Lizard       | <i>Anolis carolinensis</i> |
| Lizard_HSPA4         | ENSACAP00000013089  | Lizard       | <i>Anolis carolinensis</i> |
| Lizard_HSPA4         | ENSACAP00000023153  | Lizard       | <i>Anolis carolinensis</i> |
| Lizard_HSPA4L        | ENSACAP00000011642  | Lizard       | <i>Anolis carolinensis</i> |
| Lizard_HSPA5         | ENSACAP00000004078  | Lizard       | <i>Anolis carolinensis</i> |
| Lizard_HSPA8         | ENSACAP00000004798  | Lizard       | <i>Anolis carolinensis</i> |
| Lizard_HSPA9         | ENSACAP00000015698  | Lizard       | <i>Anolis carolinensis</i> |
| Lizard_HSPA12A       | ENSACAP00000009931  | Lizard       | <i>Anolis carolinensis</i> |
| Lizard_HSPA12B       | ENSACAP00000004138  | Lizard       | <i>Anolis carolinensis</i> |
| Lizard_HSPA13        | ENSACAP00000000965  | Lizard       | <i>Anolis carolinensis</i> |
| Lizard_HSPA14        | ENSACAP00000001088  | Lizard       | <i>Anolis carolinensis</i> |
| Lizard_HYOU1         | ENSACAP00000013983  | Lizard       | <i>Anolis carolinensis</i> |
| Lizard_HSPH1         | ENSACAP00000004913  | Lizard       | <i>Anolis carolinensis</i> |

| Associated Gene Name | NCBI/ Ensemble Protein ID | Species Name             | Latin name                 |
|----------------------|---------------------------|--------------------------|----------------------------|
| Turtle_HSPA4         | enspsip00000014785        | Chinese softshell turtle | <i>pelodiscus sinensis</i> |
| Turtle_HSPA4L        | enspsip00000010121        | Chinese softshell turtle | <i>pelodiscus sinensis</i> |
| Turtle_HSPA5         | enspsip00000005890        | Chinese softshell turtle | <i>pelodiscus sinensis</i> |
| Turtle_HSPA9         | enspsip00000014345        | Chinese softshell turtle | <i>pelodiscus sinensis</i> |
| Turtle_HSPA12B       | enspsip00000004856        | Chinese softshell turtle | <i>pelodiscus sinensis</i> |
| Turtle_HSPA13        | enspsip00000018220        | Chinese softshell turtle | <i>pelodiscus sinensis</i> |
| Turtle_HSPA14        | enspsip00000018312        | Chinese softshell turtle | <i>pelodiscus sinensis</i> |

|              |                    |                          |                            |
|--------------|--------------------|--------------------------|----------------------------|
| Turtle_HYOU1 | xp_006123893.1     | Chinese softshell turtle | <i>pelodiscus sinensis</i> |
| Turtle_HSPH1 | enspsip00000009634 | Chinese softshell turtle | <i>pelodiscus sinensis</i> |

| Associated Gene Name | NCBI Protein ID                 | Species Name        | Latin name            |
|----------------------|---------------------------------|---------------------|-----------------------|
| Frog_HSPA1A          | NP_001167480.1                  | African clawed frog | <i>Xenopus laevis</i> |
| Frog_HSPA1B          | NP_001091238.1                  | African clawed frog | <i>Xenopus laevis</i> |
| Frog_HSPA1L          | NP_001080068.1                  | African clawed frog | <i>Xenopus laevis</i> |
| Frog_HSP70           | NP_001121147.1                  | African clawed frog | <i>Xenopus laevis</i> |
| Frog_HSPA2           | NP_001086039.1                  | African clawed frog | <i>Xenopus laevis</i> |
| Frog_HSPA4           | NP_001083317.1                  | African clawed frog | <i>Xenopus laevis</i> |
| Frog_HSPA5           | NP_001081462.1                  | African clawed frog | <i>Xenopus laevis</i> |
| Frog_HSPA5B          | NP_001165648.1                  | African clawed frog | <i>Xenopus laevis</i> |
| Frog_HSPA8           | NP_001079632.1                  | African clawed frog | <i>Xenopus laevis</i> |
| Frog_HSC70.II        | NP_001165656.1                  | African clawed frog | <i>Xenopus laevis</i> |
| Frog_HSPA9A          | NP_001079627.1                  | African clawed frog | <i>Xenopus laevis</i> |
| Frog_HSPA9B          | NP_001080166.1                  | African clawed frog | <i>Xenopus laevis</i> |
| Frog_HSPA13          | NP_001017223.1                  | African clawed frog | <i>Xenopus laevis</i> |
| Frog_Hspa14          | NP_001092168.1                  | African clawed frog | <i>Xenopus laevis</i> |
| Frog_HSPA14B         | NP_001091353.1                  | African clawed frog | <i>Xenopus laevis</i> |
| Frog_HSPH1A          | NP_001085637.1                  | African clawed frog | <i>Xenopus laevis</i> |
| Frog_HYOU1           | UniProtKB/Swiss-Prot : Q566I3.2 | African clawed frog | <i>Xenopus laevis</i> |

| Associated Gene Name                 | NCBI/ <b>Ensemble</b> Protein ID | Species Name | Latin name         |
|--------------------------------------|----------------------------------|--------------|--------------------|
| Zebrafish_Hspa70.3                   | NP_571472.1                      | zebrafish    | <i>Danio rerio</i> |
| Zebrafish_Hspa70.2                   | XP_003198158.1                   | zebrafish    | <i>Danio rerio</i> |
| Zebrafish_Hspa70.1                   | <b>NP_001349288.1</b>            | zebrafish    | <i>Danio rerio</i> |
| Zebrafish_Hspa1b                     | NP_001093532.1                   | zebrafish    | <i>Danio rerio</i> |
| Zebrafish_Hspa70l                    | NP_001107061.1                   | zebrafish    | <i>Danio rerio</i> |
| Zebrafish_Hspa4a                     | NP_999881.1                      | zebrafish    | <i>Danio rerio</i> |
| Zebrafish_Hspa4b                     | NP_956151.1                      | zebrafish    | <i>Danio rerio</i> |
| Zebrafish_Hspa4l                     | XP_690505.2                      | zebrafish    | <i>Danio rerio</i> |
| Zebrafish_Hspa5                      | NP_998223.1                      | zebrafish    | <i>Danio rerio</i> |
| Zebrafish_Hspa8a                     | NP_001103873.1                   | zebrafish    | <i>Danio rerio</i> |
| Zebrafish_Hspa8b[hsc70.2(LOC562935)] | NP_001186941.1                   | zebrafish    | <i>Danio rerio</i> |
| Zebrafish_Hsc70                      | NP_956908.1                      | zebrafish    | <i>Danio rerio</i> |
| Zebrafish_Hspa9                      | NP_958483.2                      | zebrafish    | <i>Danio rerio</i> |
| Zebrafish_Hspa12a.1                  | NP_001038342.1                   | zebrafish    | <i>Danio rerio</i> |
| Zebrafish_Hspa12a.2                  | XP_003198604.1                   | zebrafish    | <i>Danio rerio</i> |
| Zebrafish_Hspa12a.3                  | NP_001038346.2                   | zebrafish    | <i>Danio rerio</i> |
| Zebrafish_Hspa13                     | NP_001082948.1                   | zebrafish    | <i>Danio rerio</i> |
| Zebrafish_Hspa14                     | NP_001038541.1                   | zebrafish    | <i>Danio rerio</i> |

|                 |                |           |                    |
|-----------------|----------------|-----------|--------------------|
| Zebrafish_Hsph1 | XP_001919957.1 | zebrafish | <i>Danio rerio</i> |
| Zebrafish_Hyou1 | NP_997868.1    | zebrafish | <i>Danio rerio</i> |

| Associated Gene Name | NCBI/ <b>Ensemble</b> Protein ID  | Species Name | Latin name             |
|----------------------|-----------------------------------|--------------|------------------------|
| Medaka_Hsp70         | XP_004071143.1                    | Medaka       | <i>Oryzias latipes</i> |
| Medaka_Hspa1b        | NP_001098384.1                    | medaka       | <i>Oryzias latipes</i> |
| Medaka_Hsc70         | NP_001098385.1                    | medaka       | <i>Oryzias latipes</i> |
| Medaka_Hspa8b        | XP_004075396.1                    | medaka       | <i>Oryzias latipes</i> |
| Medaka_Hspa8a        | UniProtKB/Swiss-Prot:<br>Q9W6Y1.1 | medaka       | <i>Oryzias latipes</i> |
| Medaka_Hspa4a        | ENSORLP00000001795                | medaka       | <i>Oryzias latipes</i> |
| Medaka_Hspa4b        | ENSORLP00000007499                | medaka       | <i>Oryzias latipes</i> |
| Medaka_Hspa4l        | XP_004082341.1                    | medaka       | <i>Oryzias latipes</i> |
| Medaka_Hspa5l        | XP_004074796.1                    | medaka       | <i>Oryzias latipes</i> |
| Medaka_Hspa9         | ENSORLP00000013340                | medaka       | <i>Oryzias latipes</i> |
| Medaka_Hspa12a       | ENSORLP00000001447                | medaka       | <i>Oryzias latipes</i> |
| Medaka_Hspa12b       | ENSORLP00000007349                | medaka       | <i>Oryzias latipes</i> |
| Medaka_Hspa13l       | XP_004075919.1                    | medaka       | <i>Oryzias latipes</i> |
| Medaka_Hspa14        | ENSORLP00000015785                | medaka       | <i>Oryzias latipes</i> |
| Medaka_Hyou1l        | XP_004084567.1                    | medaka       | <i>Oryzias latipes</i> |

| Associated Gene Name      | NCBI Protein ID | Species Name | Latin name                   |
|---------------------------|-----------------|--------------|------------------------------|
| Nile tilapia_hsp70.3      | xp_003442504.1  | nile tilapia | <i>oreochromis niloticus</i> |
| Nile_tilapia_Hspa1b       | xp_003444871.1  | nile tilapia | <i>oreochromis niloticus</i> |
| Nile tilapia_Hspa8a       | xp_003448938.1  | Nile tilapia | <i>oreochromis niloticus</i> |
| Nile_tilapia_Hsc70        | xp_003454400.1  | nile tilapia | <i>oreochromis niloticus</i> |
| Nile tilapia_Hspa8b       | xp_003455104.1  | nile tilapia | <i>oreochromis niloticus</i> |
| Nile tilapia_Hspa4l       | xp_003453147.1  | nile tilapia | <i>oreochromis niloticus</i> |
| Nile tilapia_Hspa5a       | xp_005470418.1  | nile tilapia | <i>oreochromis niloticus</i> |
| Nile tilapia_Hspa5b       | xp_003459659.1  | nile tilapia | <i>oreochromis niloticus</i> |
| Nile tilapia_Hspa9        | xp_003459471.1  | nile tilapia | <i>oreochromis niloticus</i> |
| Nile_tilapia_loc100699432 | xp_003457416.1  | nile tilapia | <i>oreochromis niloticus</i> |
| Nile tilapia_Hspa12b      | xp_003452414.1  | nile tilapia | <i>oreochromis niloticus</i> |
| Nile_tilapia_loc100708509 | xp_003441638.1  | nile tilapia | <i>oreochromis niloticus</i> |
| Nile_tilapia_loc100697637 | xp_003455685.1  | nile tilapia | <i>oreochromis niloticus</i> |
| Nile_tilapia_loc100691644 | xp_003448981.1  | nile tilapia | <i>oreochromis niloticus</i> |

| Associated Gene Name  | NCBI/ Ensemble Protein ID | Species Name | Latin name               |
|-----------------------|---------------------------|--------------|--------------------------|
| Torafugu_Hsp70.3      | XP_003964983.1            | torafugu     | <i>Takifugu rubripes</i> |
| Torafugu_Hspa1b       | XP_003963154.1            | torafugu     | <i>Takifugu rubripes</i> |
| Torafugu_Hspa2        | ENSTRUT00000005983        | torafugu     | <i>Takifugu rubripes</i> |
| Torafugu_Hspa8        | XP_003977939.1            | torafugu     | <i>Takifugu rubripes</i> |
| Torafugu_Hsc70        | XP_003966054.1            | torafugu     | <i>Takifugu rubripes</i> |
| Torafugu_loc101063130 | XP_003965205.1            | torafugu     | <i>Takifugu rubripes</i> |

|                       |                    |          |                          |
|-----------------------|--------------------|----------|--------------------------|
| Torafugu_loc101077300 | XP_003977088.1     | torafugu | <i>Takifugu rubripes</i> |
| Torafugu_loc101063656 | XP_003968291.1     | torafugu | <i>Takifugu rubripes</i> |
| Torafugu_Hspa4a       | ENSTRUT00000021036 | torafugu | <i>Takifugu rubripes</i> |
| Torafugu_Hspa4b       | ENSTRUT00000016139 | torafugu | <i>Takifugu rubripes</i> |
| Torafugu_Hspa12a      | ENSTRUT00000009556 | torafugu | <i>Takifugu rubripes</i> |
| Torafugu_Hspa12b      | ENSTRUT00000006941 | torafugu | <i>Takifugu rubripes</i> |
| Torafugu_Hspa14       | ENSTRUT00000031936 | torafugu | <i>Takifugu rubripes</i> |
| Torafugu_loc101065326 | XP_003977948.1     | torafugu | <i>Takifugu rubripes</i> |

| Associated Gene Name | Ensemble Protein ID | Species Name | Latin name                    |
|----------------------|---------------------|--------------|-------------------------------|
| Stickleback_Hspa4a   | ENSGACP00000027410  | Stickleback  | <i>Gasterosteus aculeatus</i> |
| Stickleback_Hspa4b   | ENSGACP00000024055  | Stickleback  | <i>Gasterosteus aculeatus</i> |
| Stickleback_Hspa4l   | ENSGACP00000010866  | Stickleback  | <i>Gasterosteus aculeatus</i> |
| Stickleback_Hspa5    | ENSGACP00000021969  | Stickleback  | <i>Gasterosteus aculeatus</i> |
| Stickleback_HSPA8a   | ENSGACP00000013930  | Stickleback  | <i>Gasterosteus aculeatus</i> |
| Stickleback_Hspa8b   | ENSGACP00000026579  | Stickleback  | <i>Gasterosteus aculeatus</i> |
| Stickleback_Hspa9    | ENSGACP00000025843  | Stickleback  | <i>Gasterosteus aculeatus</i> |
| Stickleback_Hspa12a  | ENSGACP00000019311  | Stickleback  | <i>Gasterosteus aculeatus</i> |
| Stickleback_Hspa12b  | ENSGACP00000026246  | Stickleback  | <i>Gasterosteus aculeatus</i> |
| Stickleback_Hspa13   | ENSGACP00000008388  | Stickleback  | <i>Gasterosteus aculeatus</i> |
| Stickleback_Hspa14   | ENSGACP00000025513  | Stickleback  | <i>Gasterosteus aculeatus</i> |
| Stickleback_Hyou1    | ENSGACP00000026575  | Stickleback  | <i>Gasterosteus aculeatus</i> |

| Associated Gene Name         | NCBI Protein ID | Species Name         | Latin name                 |
|------------------------------|-----------------|----------------------|----------------------------|
| Larimichthys crocea_Hsp70    | XP_010753364.1  | Large Yellow Croaker | <i>Larimichthys crocea</i> |
| Larimichthys crocea_Hspa1b   | XP_010738994.1  | Large Yellow Croaker | <i>Larimichthys crocea</i> |
| Larimichthys crocea_Hspa4a   | XP_010727629.1  | Large Yellow Croaker | <i>Larimichthys crocea</i> |
| Larimichthys crocea_Hspa4b   | XP_010753054.2  | Large Yellow Croaker | <i>Larimichthys crocea</i> |
| Larimichthys crocea_Hspa4l.1 | XP_019132630.1  | Large Yellow Croaker | <i>Larimichthys crocea</i> |
| Larimichthys crocea_Hspa4l.2 | XP_019135064.1  | Large Yellow Croaker | <i>Larimichthys crocea</i> |
| Larimichthys crocea_Hspa5.1  | XP_010737097.1  | Large Yellow Croaker | <i>Larimichthys crocea</i> |
| Larimichthys crocea_Hspa5.2  | XP_019129638.1  | Large Yellow Croaker | <i>Larimichthys crocea</i> |
| Larimichthys crocea_Hspa8a   | XP_019135026.1  | Large Yellow Croaker | <i>Larimichthys crocea</i> |
| Larimichthys crocea_Hspa8b   | XP_019126385.1  | Large Yellow Croaker | <i>Larimichthys crocea</i> |
| Larimichthys crocea_Hsc70    | XP_010745868.1  | Large Yellow Croaker | <i>Larimichthys crocea</i> |
| Larimichthys crocea_Hspa9    | XP_010732361.2  | Large Yellow Croaker | <i>Larimichthys crocea</i> |
| Larimichthys crocea_Hspa12a  | XP_019113459.1  | Large Yellow Croaker | <i>Larimichthys crocea</i> |
| Larimichthys crocea_Hspa12b  | XP_019111192.1  | Large Yellow Croaker | <i>Larimichthys crocea</i> |
| Larimichthys crocea_Hspa13   | XP_010755439.1  | Large Yellow Croaker | <i>Larimichthys crocea</i> |
| Larimichthys crocea_Hspa14   | XP_019121868.1  | Large Yellow Croaker | <i>Larimichthys crocea</i> |
| Larimichthys crocea_Hyou1    | XP_019135047.1  | Large Yellow Croaker | <i>Larimichthys crocea</i> |
